# Supplementary material for: Extracellular lipid loading augments hypoxic paracrine signaling and promotes glioma angiogenesis and macrophage infiltration
Source: PubMed Central journal article supplement (PMC6556032; doi:10.1186/s13046-019-1228-6), 2019-06-07

**A.** HBMEC Migration

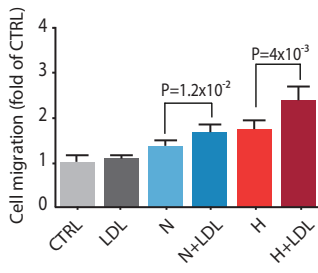

**B.** HBMEC Proliferation

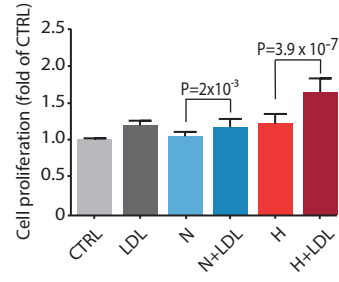

**C.** THP-1 Migration

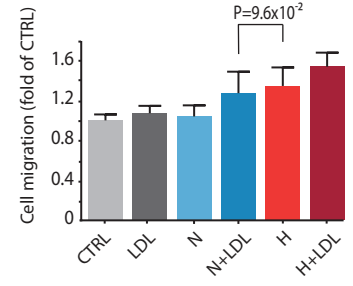

Supplement: 13046_2019_1228_MOESM5_ESM.pdf [file 13046_2019_1228_MOESM5_ESM.pdf]
